# Supplementary material
Source: ML conference proceedings conference paper supplement (https://openreview.net/forum?id=70fOkZPtGqT)
Supplement: supplementary_material [file attachment]

## Supplementary Material

### A Auxiliary Results

**Lemma 1** ([19, 20]). *Suppose every  $f \in \mathcal{F}$  is  $L$ -Lipschitz continuous. When  $p \in [1, \infty)$ , it holds that*

$$\mathcal{L}_{n,p}^{\text{wo}}(f; \varrho) = \min_{\lambda \geq 0} \left\{ \lambda \varrho^p + \frac{1}{n} \sum_{i=1}^n \sup_{x \in \mathcal{X}} \{f(x) - \lambda \|x - \hat{x}^i\|^p\} \right\}.$$

When  $p = \infty$ , it holds that

$$\mathcal{L}_{n,\infty}^{\text{wo}}(f; \varrho) = \mathcal{L}_{n,\infty}^{\text{ro}}(f; \varrho) = \frac{1}{n} \sum_{i=1}^n \sup_{x \in \mathcal{X}, \|x - \hat{x}^i\| \leq \varrho} f(x).$$

**Lemma 2** (Lemma 2 in [29]).

$$\mathbb{E}_S \left[ \sup_{f \in \mathcal{F}} (\mathbb{E}_{\mathbb{P}_{\text{true}}} [f] - \mathbb{E}_n [f]) \right] \leq 2\mathfrak{R}_n(\mathcal{F}).$$

**Lemma 3.** *Suppose  $f(x) \in [0, M]$  for all  $f \in \mathcal{F}$ , then for any  $t > 0$ , with probability  $1 - e^{-t}$ , we have:*

$$\sup_{f \in \mathcal{F}} |\mathbb{E}_{\mathbb{P}_{\text{true}}} [f] - \mathbb{E}_{\mathbb{P}_n} [f]| \leq 2\mathfrak{R}_n(\mathcal{F}) + M \sqrt{\frac{t}{2n}}.$$

*If we have  $\|f\|_\infty < M$ , then by replacing  $f$  by  $f + M$ , we can get the same result by replacing  $M$  by  $2M$ .*

**Lemma 4** (Contraction Lemma). *Let  $f$  be a  $L$ -Lipschitz function, and  $\mathcal{F}$  a family of functions on  $\mathcal{X}$ . Then:*

$$\mathfrak{R}_n(f \circ \mathcal{F}) \leq L \cdot \mathfrak{R}_n(\mathcal{F}),$$

where  $f \circ \mathcal{F} = \{f \circ g : g \in \mathcal{F}\}$ .

We bound  $\|\partial f\|_{q, \mathbb{P}_n}$  and  $\|\partial f\|_{q, \mathbb{P}_{\text{true}}}$  in both absolute difference and relative difference.

**Lemma 5.** *Assume Assumptions 1 and 3 hold. Then*

$$\left| \|\partial f\|_{q, \mathbb{P}_n} - \|\partial f\|_{q, \mathbb{P}_{\text{true}}} \right| \leq \frac{1}{q} (\eta \wedge \tilde{\eta})^{-\frac{q}{p}} \left| \|\partial f\|_{q, \mathbb{P}_n}^q - \|\partial f\|_{q, \mathbb{P}_{\text{true}}}^q \right|.$$

Let  $t > 0$ . Then with probability at least  $1 - e^{-t}$ ,

$$\|\partial f\|_q \leq \|\partial f\|_{q, \mathbb{P}_n} \left( 1 - 2\mathfrak{R}_n(\mathcal{N}_q) - (L/\eta)^q \sqrt{\frac{t}{2n}} \right)^{-\frac{1}{q}}, \quad \forall f \in \mathcal{F}.$$

*Proof.* For the first part, notice that the function  $s \mapsto s^{\frac{1}{q}}$  is Lipschitz continuous on  $((\eta \wedge \tilde{\eta})^q, \infty)$  with constant no larger than  $\frac{1}{q} (\eta \wedge \tilde{\eta})^{-\frac{q}{p}}$ . The result follows from the Mean Value Theorem.

For the second part, using McDiarmid's inequality, with probability at least  $1 - e^{-t}$ , for every  $f \in \mathcal{F}$ ,

$$\sup_{f \in \mathcal{F}} \left| \mathbb{E}_{\mathbb{P}_n} \left[ \frac{\|\partial f(x)\|_q^q}{\|\partial f\|_{\mathbb{P}_{\text{true}}, q}^q} \right] - 1 \right| \leq \mathbb{E}_{S_n} \left[ \sup_{f \in \mathcal{F}} \left| \mathbb{E}_{\mathbb{P}_n} \left[ \frac{\|\partial f(x)\|_q^q}{\|\partial f\|_{\mathbb{P}_{\text{true}}, q}^q} \right] - 1 \right| \right] + (L/\eta)^q \sqrt{\frac{t}{2n}},$$

which implies that

$$\frac{\|\partial f(x)\|_{\mathbb{P}_n, q}^q}{\|\partial f(x)\|_{\mathbb{P}_{\text{true}}, q}^q} - 1 \geq -2\mathfrak{R}_n(\partial \mathcal{F}_q) - (L/\eta)^q \sqrt{\frac{t}{2n}}.$$

Thus, it holds that

$$\|\partial f\|_{\mathbb{P}_{\text{true}}, q} \leq \|\partial f\|_{\mathbb{P}_n, q} \left( 1 - 2\mathfrak{R}_n(\partial \mathcal{F}_q) - (L/\eta)^q \sqrt{\frac{t}{2n}} \right)^{-\frac{1}{q}}.$$

□

## B Proofs for Section 3

### B.1 Proof of Proposition 1

By [18, Lemma EC.8], for all  $\delta \geq 0$ ,

$$\left| \sup_{x \in \mathcal{X}, \|x - \hat{x}^i\| \leq \delta} f(x) - f(\hat{x}^i) - |\partial f|(\hat{x}^i)\delta \right| \leq h\delta^{\alpha+1} + 2L(\delta - d(\hat{x}^i, \mathcal{D}_f))_+. \quad (4)$$

We start with the simple case of  $p = \infty$ , for which (WO) and (RO) coincide. Using Lemma 1, we have

$$\mathcal{L}_{n,\infty}^{\text{wo}}(f; \varrho) = \mathcal{L}_{n,\infty}^{\text{ro}}(f; \varrho) = \frac{1}{n} \sum_{i=1}^n \sup_{x \in \mathcal{X}, \|x - \hat{x}^i\| \leq \varrho} f(x).$$

By (2) and (4),

$$|\mathcal{L}_{n,\infty}^{\text{wo}}(f; \varrho) - \mathcal{L}_{n,q}^{\text{vr}}(f; \varrho)| \leq h\varrho^{\alpha+1} + 2Le_n(\varrho).$$

Next we consider  $p \in (1, \infty)$ . Let us first prove for the upper bound. By Assumption 1,

$$0 \leq \sup_{x^i \in \mathcal{X}} \{f(x^i) - f(\hat{x}^i) - \lambda \|x^i - \hat{x}^i\|^p\} \leq \sup_{\delta \geq 0} \{L\delta - \lambda\delta^p\},$$

hence the optimal  $\delta$  satisfies

$$\delta \leq \left(\frac{L}{\lambda}\right)^{\frac{1}{p-1}}. \quad (5)$$

If  $p < 1 + \alpha$ , by (4) we can bound the inner maximization as

$$\begin{aligned} & \sup_{x^i} \{f(x^i) - f(\hat{x}^i) - \lambda \|x^i - \hat{x}^i\|^p\} \\ &= \sup_{0 \leq \delta \leq \left(\frac{L}{\lambda}\right)^{\frac{1}{p-1}}, \|x^i - \hat{x}^i\| \leq \delta} \{f(x^i) - f(\hat{x}^i) - \lambda\delta^p\} \\ &\leq \sup_{0 \leq \delta \leq \left(\frac{L}{\lambda}\right)^{\frac{1}{p-1}}} \{|\partial f|(\hat{x}^i)\delta + h\delta^{\alpha+1} + 2L(\delta - d(\hat{x}^i, \mathcal{D}_f))_+ - \lambda\delta^p\} \\ &\leq \sup_{0 \leq \delta \leq \left(\frac{L}{\lambda}\right)^{\frac{1}{p-1}}} \{|\partial f|(\hat{x}^i)\delta - (\lambda - h\delta^{\alpha+1-p})\delta^p + 2L(\delta - d(\hat{x}^i, \mathcal{D}_f))_+\} \\ &\leq \sup_{\delta \geq 0} \{|\partial f|(\hat{x}^i)\delta - (\lambda - h\left(\frac{L}{\lambda}\right)^{\frac{\alpha+1-p}{p-1}})\delta^p\} + 2L\left(\left(\frac{L}{\lambda}\right)^{\frac{1}{p-1}} - d(\hat{x}^i, \mathcal{D}_f)\right)_+, \end{aligned}$$

which can be finite only when  $\lambda \geq L\left(\frac{h}{L}\right)^{\frac{p-1}{\alpha}}$ . It follows from Lemma 1 that

$$\begin{aligned} & \mathcal{L}_{n,p}^{\text{wo}}(f; \varrho) - \frac{1}{n} \sum_{i=1}^n f(\hat{x}^i) \\ &\leq \min_{\lambda \geq L\left(\frac{h}{L}\right)^{\frac{p-1}{\alpha}}} \left\{ \lambda\varrho^p + \frac{1}{n} \sum_{i=1}^n \sup_{\delta_i > 0} \{|\partial f|(\hat{x}^i)\delta_i - (\lambda - h\left(\frac{L}{\lambda}\right)^{\frac{\alpha+1-p}{p-1}})\delta_i^p\} + 2L\left(\left(\frac{L}{\lambda - L\left(\frac{h}{L}\right)^{\frac{p-1}{\alpha}}}\right)^{\frac{1}{p-1}} - d(\hat{x}^i, \mathcal{D}_f)\right)_+ \right\} \\ &\stackrel{\lambda \leftarrow \lambda - L\left(\frac{h}{L}\right)^{\frac{p-1}{\alpha}}}{=} \min_{\lambda \geq 0} \left\{ \lambda\varrho^p + \frac{1}{n} \sum_{i=1}^n \sup_{\delta_i > 0} \{|\partial f|(\hat{x}^i)\delta_i - \lambda\delta_i^p\} + 2L\left(\left(\frac{L}{\lambda}\right)^{\frac{1}{p-1}} - d(\hat{x}^i, \mathcal{D}_f)\right)_+ \right\} + L\left(\frac{h}{L}\right)^{\frac{p-1}{\alpha}} \varrho^p \\ &\stackrel{\lambda = \frac{\|\partial f\|_{\mathbb{P}_{n,q}} \varrho^{1-p}}{p}}{\leq} \|\partial f\|_{\mathbb{P}_{n,q}} \cdot \varrho + L\left(\frac{h}{L}\right)^{\frac{p-1}{\alpha}} \varrho^p + 2L\mathbb{E}_{\mathbb{P}_n} \left[ \left( \left( \frac{Lp}{\|\partial f\|_{\mathbb{P}_{n,q}}} \right)^{\frac{1}{p-1}} \varrho - d(\hat{x}^i, \mathcal{D}_f) \right)_+ \right]. \end{aligned} \quad (6)$$

If  $p \geq 1 + \alpha$ , by (4) and (5), we have

$$\sup_{x^i} \{f(x^i) - f(\hat{x}^i) - \lambda \|x^i - \hat{x}^i\|^p\} \leq \sup_{\delta \geq 0} \{|\partial f|(\hat{x}^i)\delta - \lambda\delta^p\} + h\left(\frac{L}{\lambda}\right)^{\frac{\alpha+1}{p-1}} + L\left(\left(\frac{L}{\lambda}\right)^{\frac{1}{p-1}} - d(\hat{x}^i, \mathcal{D}_f)\right)_+.$$

It follows that

$$\begin{aligned} & \mathcal{L}_{n,p}^{\text{wo}}(f; \varrho) - \frac{1}{n} \sum_{i=1}^n f(\hat{x}^i) \\ &\leq \min_{\lambda \geq 0} \left\{ \lambda\varrho^p + \frac{1}{n} \sum_{i=1}^n \sup_{\delta_i > 0} \{|\partial f|(\hat{x}^i)\delta_i - \lambda\delta_i^p\} + h\left(\frac{L}{\lambda}\right)^{\frac{\alpha+1}{p-1}} + L\left(\left(\frac{L}{\lambda}\right)^{\frac{1}{p-1}} - d(\hat{x}^i, \mathcal{D}_f)\right)_+ \right\} \quad (7) \\ &\leq \|\partial f\|_{\mathbb{P}_{n,q}} \cdot \varrho + h\left(\frac{Lp}{\|\partial f\|_{\mathbb{P}_{n,q}}}\right)^{\frac{\alpha+1}{p-1}} \varrho^{\alpha+1} + 2L\mathbb{E}_{\mathbb{P}_n} \left[ \left( \left( \frac{Lp}{\|\partial f\|_{\mathbb{P}_{n,q}}} \right)^{\frac{1}{p-1}} \varrho - d(\hat{x}^i, \mathcal{D}_f) \right)_+ \right], \end{aligned}$$

where the last inequality holds by taking a feasible solution  $\lambda = \frac{\|\partial f\|_{q, \mathbb{P}_n} \varrho^{1-p}}{p}$ . This completes the proof for the upper bound.

Next, we prove the lower bound. If  $p \geq \alpha + 1$ , by (4) we have

$$\begin{aligned} & \frac{1}{n} \sup_{\{x^i\}_{i \in \mathcal{X}}} \sum_{i=1}^n (f(x^i) - f(\hat{x}^i)) \\ & \geq \frac{1}{n} \sum_{i=1}^n \sup_{\delta_i \geq 0} \{ |\partial f|(\hat{x}^i) \delta_i - h \delta_i^{\alpha+1} - 2L(\delta_i - d(\hat{x}^i, \mathcal{D}_f))_+ : \frac{1}{n} \sum_{i=1}^n \delta_i^p \leq \varrho^p \} \\ & \geq \frac{1}{n} \sup_{\delta_i \geq 0} \{ \sum_{i=1}^n |\partial f|(\hat{x}^i) \delta_i - 2L(\delta - d(\hat{x}^i, \mathcal{D}_f))_+ : \frac{1}{n} \sum_{i=1}^n \delta_i^p \leq \varrho^p \} - \frac{1}{n} \sup_{\delta_i \geq 0} \{ h \delta_i^{\alpha+1} : \frac{1}{n} \sum_{i=1}^n \delta_i^p \leq \varrho^p \} \\ & \geq \|\partial f\|_{q, \mathbb{P}_n} \varrho - 2L \cdot \mathbb{E}_{\mathbb{P}_n} \left[ \left( \left( \frac{\|\partial f\|_{q, \mathbb{P}_n}}{\|\partial f\|_{q, \mathbb{P}_n}} \right)^{q-1} \varrho - d(\hat{x}, \mathcal{D}_f) \right)_+ \right] - h \varrho^{\alpha+1}, \end{aligned}$$

where the first term in the last inequality is obtained by taking  $\delta_i = \frac{|\partial f|(\hat{x}^i)^{q-1}}{\|\partial f\|_{q, \mathbb{P}_n}^{q-1}} \varrho$ , and the second term is due to Hölder's inequality.

If  $p < \alpha + 1$ , using Lemma 1 and the fact that the optimal  $\delta < (\frac{L}{h})^{\frac{1}{\alpha}}$  (c.f. (5)), we have

$$\mathcal{L}_{n,p}^{\text{wo}}(f; \varrho) - \frac{1}{n} \sum_{i=1}^n f(\hat{x}^i) \geq \min_{\lambda \geq 0} \left\{ \lambda \varrho^p + \frac{1}{n} \sum_{i=1}^n \sup_{0 \leq \delta \leq (\frac{L}{h})^{\frac{1}{\alpha}}, \|x^i - \hat{x}^i\| \leq \delta} \{ f(x_i) - f(\hat{x}^i) - \lambda \delta^p \} \right\},$$

Using 4 we can bound the inner supremum as

$$\begin{aligned} & \sup_{0 \leq \delta \leq (\frac{L}{h})^{\frac{1}{\alpha}}, \|x^i - \hat{x}^i\| \leq \delta} \{ f(x_i) - f(\hat{x}^i) - \lambda \delta^p \} \\ & \geq \sup_{\delta \geq 0} \{ |\partial f|(\hat{x}^i) \delta - (\lambda + h(\frac{L}{h})^{\frac{\alpha+1-p}{\alpha}}) \delta^p - 2L(\delta - d(\hat{x}^i, \mathcal{D}_f))_+ \}. \end{aligned}$$

It follows that

$$\begin{aligned} & \mathcal{L}_{n,p}^{\text{wo}}(f; \varrho) - \frac{1}{n} \sum_{i=1}^n f(\hat{x}^i) \\ & \geq \min_{\lambda \geq 0} \lambda \varrho^p + \frac{1}{n} \sum_{i=1}^n \sup_{\delta \geq 0} \{ |\partial f|(\hat{x}^i) \delta - (\lambda + h(\frac{L}{h})^{\frac{\alpha+1-p}{\alpha}}) \delta^p - 2L(\delta - d(\hat{x}^i, \mathcal{D}_f))_+ \} \\ & \geq \|\partial f\|_{q, \mathbb{P}_n} \cdot \varrho - h(\frac{L}{h})^{\frac{\alpha+1-p}{\alpha}} \varrho^p - 2L \cdot \mathbb{E}_{\mathbb{P}_n} \left[ \left( \left( \frac{\|\partial f\|_{q, \mathbb{P}_n}}{\|\partial f\|_{q, \mathbb{P}_n}} \right)^{q-1} \varrho - d(\hat{x}, \mathcal{D}_f) \right)_+ \right], \end{aligned}$$

where the last inequality holds by taking  $\delta = \frac{|\partial f|(\hat{x})^{q-1}}{\|\partial f\|_{q, \mathbb{P}_n}^{q-1}} \varrho$ . Finally, using the assumption that  $\|\partial f\|_{q, \mathbb{P}_n} \geq \tilde{\eta}$  for all  $f \in \mathcal{F}$ , we get the desired result.

We remark that the result can be extended to arbitrary nominal distributions using exactly the same idea, with summation replaced by integration.

## B.2 Proof of Proposition 2

Since  $\mathcal{L}_{n,p}^{\text{wo}}(\varrho) - \mathcal{L}_{n,p}^{\text{ro}}(\varrho) \geq 0$  trivially holds, it suffices to prove the other direction. Fixing  $f \in \mathcal{F}$ , consider the dual problem from Lemma 1,

$$\mathcal{L}_{n,p}^{\text{wo}}(\varrho) = \min_{\lambda \geq 0} \left\{ \lambda \varrho^p + \frac{1}{n} \sum_{i=1}^n \sup_{x^i \in \mathcal{X}} \{ f(x^i) - \lambda \|x^i - \hat{x}^i\|^p \} \right\}.$$

Define

$$v(\lambda) = \lambda \varrho^p + \frac{1}{n} \sum_{i=1}^n \sup_{x \in \mathcal{X}} \{ f(x) - \lambda \|x - \hat{x}^i\|^p \},$$

and let  $\lambda_n$  be a minimizer. If  $\lambda_n = 0$ , then  $\mathcal{L}_{n,p}^{\text{wo}}(\varrho) = \mathcal{L}_{n,p}^{\text{ro}}(\varrho)$ , since there exists a worst-case distribution that supports on  $n$  points according to the structure of the worst-case distribution [19]. In

the sequel we consider  $\lambda_n > 0$ . By Assumption 1 and the structure of the worst-case distribution [19],  $\mathcal{L}_{n,p}^{\text{wo}}(\varrho)$  is attained at a distribution of the form

$$\frac{1}{n} \sum_{i=1}^{n-1} \delta_{x^i} + \frac{1-\epsilon}{n} \delta_{x_-^n} + \frac{\epsilon}{n} \delta_{x_+^n},$$

where

$$\begin{aligned} x^i &\in \arg \max_{x \in \mathcal{X}} \{f(x) - \lambda \|x - \hat{x}^i\|^p\}, \quad i = 1, \dots, n, \\ x_{\pm}^n &\in \arg \max_{x \in \mathcal{X}} \{f(x) - \lambda \|x - \hat{x}^n\|^p\}, \end{aligned}$$

and

$$\frac{1}{n} \sum_{i=1}^{n-1} \|x^i - \hat{x}^i\|^p + \frac{1-\epsilon}{n} \|x_-^n - \hat{x}^n\|^p + \frac{\epsilon}{n} \|x_+^n - \hat{x}^n\|^p = \varrho^p.$$

By (5), we have that  $\|x^i - \hat{x}^i\| \leq (\frac{L}{\lambda_n})^{\frac{1}{p-1}}$ . Without loss of generality, we assume that  $\|x_+^n - \hat{x}^n\| \geq \|x_-^n - \hat{x}^n\|$ , which implies  $f(x_+^n) \geq f(x_-^n)$ . It follows that  $\{x^i, i = 1, \dots, n-1, x_-^n\} \in \mathcal{X}_p(\varrho)$ , and we have

$$\begin{aligned} \max_{\{x^i\}_{i=1}^n \in \mathcal{X}_p(\varrho)} \frac{1}{n} \sum_{i=1}^n f(x^i) &\geq \frac{1}{n} \sum_{i=1}^{n-1} f(x^i) + \frac{1}{n} f(x_-^n) \\ &\geq \mathcal{L}_{n,p}^{\text{wo}}(\varrho) - \frac{\epsilon}{n} (f(x_-^n) - f(x_+^n)) \\ &\geq \mathcal{L}_{n,p}^{\text{wo}}(\varrho) - \frac{2L}{n} \left(\frac{L}{\lambda_n}\right)^{\frac{1}{p-1}}. \end{aligned}$$

It remains to lower bound  $\lambda_n$ . To this end, observe that by choosing  $\lambda_0 = \frac{\|\partial f\|_{\mathbb{P}_{n,q}}}{p} \varrho^{-p+1}$ , by (6) and (7), we have for all  $f \in \mathcal{F}$ ,

$$\begin{aligned} v(\lambda_0) - \frac{1}{n} \sum_{i=1}^n f(\hat{x}^i) &\leq \|\partial f\|_{\mathbb{P}_{n,q}} \cdot \varrho + 2Le_n \left( \left( \frac{Lp}{\|\partial f\|_{\mathbb{P}_{n,q}}} \right)^{\frac{1}{p-1}} \varrho \right) \\ &\quad + \mathbf{1}\{p < \alpha + 1\} L \left(\frac{h}{L}\right)^{\frac{p-1}{\alpha}} \varrho^p + \mathbf{1}\{p \geq \alpha + 1\} h \left(\frac{Lp}{\|\partial f\|_{\mathbb{P}_{n,q}}}\right) \varrho^{\alpha+1}, \end{aligned}$$

recalling that  $e_n$  is defined in (2). Also note that

$$\begin{aligned} v(\lambda_n) - \frac{1}{n} \sum_{i=1}^n f(\hat{x}^i) &\stackrel{(4)}{\geq} \lambda_n \varrho^p + \frac{1}{n} \sum_{i=1}^n \sup_{\delta_i \geq 0} \{|\partial f|(\hat{x}^i) \delta_i - h \delta_i^{\alpha+1} - 2L(\delta_i - d(\hat{x}^i, \mathcal{D}_f))_+ - \lambda_n \delta_i^p\} \\ &\stackrel{\delta_i=2\varrho}{\geq} 2\|\partial f\|_{q, \mathbb{P}_n} \cdot \varrho - 2^{\alpha+1} \varrho^{\alpha+1} h - (2^p - 1) \varrho^p \lambda_n - 2Le_n(2\varrho). \end{aligned}$$

If

$$\begin{aligned} (2^p - 1) \varrho^p \lambda_n &< \|\partial f\|_{q, \mathbb{P}_n} \cdot \varrho - 2^{\alpha+1} \varrho^{\alpha+1} h - 2Le_n(2\varrho) \\ &\quad - 2Le_n \left( \left( \frac{Lp}{\|\partial f\|_{\mathbb{P}_{n,q}}} \right)^{\frac{1}{p-1}} \varrho \right) - L \left(\frac{h}{L}\right)^{\frac{p-1}{\alpha}} \varrho^p - h \left(\frac{Lp}{\|\partial f\|_{\mathbb{P}_{n,q}}}\right) \varrho^{\alpha+1}, \end{aligned}$$

then

$$\begin{aligned} v(\lambda_n) - \frac{1}{n} \sum_{i=1}^n f(\hat{x}^i) &> \|\partial f\|_{q, \mathbb{P}_n} \cdot \varrho + 2Le_n \left( \left( \frac{Lp}{\|\partial f\|_{\mathbb{P}_{n,q}}} \right)^{\frac{1}{p-1}} \varrho \right) + L \left(\frac{h}{L}\right)^{\frac{p-1}{\alpha}} \varrho^p + h \left(\frac{Lp}{\|\partial f\|_{\mathbb{P}_{n,q}}}\right) \varrho^{\alpha+1} \\ &\geq v(\lambda_0) - \frac{1}{n} \sum_{i=1}^n f(\hat{x}^i), \end{aligned}$$

which is contradicted to the optimality of  $\lambda_n$ . Hence, we must have

$$\begin{aligned} (2^p - 1) \varrho^p \lambda_n &\geq \|\partial f\|_{q, \mathbb{P}_n} \cdot \varrho - 2^{\alpha+1} \varrho^{\alpha+1} h - 2Le_n(2\varrho) \\ &\quad - 2Le_n \left( \left( \frac{Lp}{\|\partial f\|_{\mathbb{P}_{n,q}}} \right)^{\frac{1}{p-1}} \varrho \right) - L \left(\frac{h}{L}\right)^{\frac{p-1}{\alpha}} \varrho^p - h \left(\frac{Lp}{\|\partial f\|_{\mathbb{P}_{n,q}}}\right) \varrho^{\alpha+1}, \end{aligned}$$

hence we complete the proof.

### B.3 Proof of Proposition 3

In the sequel, when the loss function  $f \in \mathcal{F}$  is clear from the context, we denote  $H(x), G(x)$  for  $H_f(x), G_f(x)$ , and  $G_i$  for  $G(\hat{x}_i)$  to simplify the notation. The upper bound is straightforward.

To prove the lower bound, we first consider (WO), without loss of generality, we assume that  $G(\hat{x}^1) \geq G(\hat{x}^2) \geq \dots \geq G(\hat{x}^n)$ , otherwise we just relabel them. Suppose the maximum in defining  $G_i$  is attained at  $\tilde{x}^i$  with distance  $d_i$  from  $\hat{x}^i$ ; otherwise we can use an approximation argument. Starting from  $i = 1$ , if  $d_i > n^\delta \varrho$ , we set  $x^i = \tilde{x}^i$ , otherwise we set  $x^i = \hat{x}^i + n^\delta \varrho u_i$ , where  $u_i$  is a direction to be determined later, i.e., we perturb  $\hat{x}^i$  with distance  $\delta_i = \|x^i - \hat{x}^i\| = \max(d_i, n^\delta \varrho)$ , in the direction of  $\tilde{x}^i - \hat{x}^i$  if  $d_i > n^\delta \varrho$ , or  $u_i$  otherwise. Then we proceed to  $i + 1$ , until we achieve the largest  $N$  such that  $\frac{1}{n} \sum_{i=1}^N \delta_i \leq \varrho$ . Note that since each  $\delta_i \geq n^\delta \varrho$ , we have  $N \leq \lfloor n^{1-\delta} \rfloor$ . If for some  $i$  we cannot perturb it with fully mass  $1/n$ , we perturb  $\frac{\epsilon}{n}$  of  $\hat{x}_{N+1}$ , so that  $\frac{1}{n} \sum_{i=1}^N \delta_i + \frac{\epsilon}{n} \delta_{N+1} = \varrho$ , where  $0 \leq \epsilon \leq 1$ . By construction,  $\{x^i\}_{i=1 \dots n} \in \mathcal{X}_1(\varrho)$ . Hence we have

$$\begin{aligned} & \frac{1}{n} \sum_{i=1}^n (f(x^i) - f(\hat{x}^i)) \\ & \geq \frac{1}{n} \sum_{i=1}^N (f(x^i) - f(\hat{x}^i)) + \frac{\epsilon}{n} (f(x^{N+1}) - f(\hat{x}^{N+1})) \\ & = \frac{1}{n} \left[ \sum_{i: d_i > n^\delta \varrho} (f(x^i) - f(\hat{x}^i)) + \sum_{i: d_i \leq n^\delta \varrho} (f(x^i) - f(\hat{x}^i)) \right] + \frac{\epsilon}{n} (f(x^{N+1}) - f(\hat{x}^{N+1})) \\ & = \frac{1}{n} \left[ \sum_{i: d_i > n^\delta \varrho} \delta_i G_i + \sum_{i: d_i \leq n^\delta \varrho} (f(x^i) - f(\hat{x}^i)) \right] + \frac{\epsilon}{n} (f(x^{N+1}) - f(\hat{x}^{N+1})). \end{aligned}$$

To bound second sum above involving  $d_i \leq n^\delta \varrho$ , by (4), we choose  $u_i$  (and thus  $x^i$ ) so that

$$f(x^i) - f(\hat{x}^i) \geq |\partial f|(\hat{x}^i) \delta_i - (h \cdot \delta_i^{\alpha+1} + L(\delta_i - d(\hat{x}^i, \mathcal{D}_f)))_+. \quad (8)$$

On the other hand, to bound the first sum above involving the difference between  $G_i$  and  $|\partial f|(\hat{x}^i)$ , by (4) and  $\delta_i \geq d_i > 0$  when  $d_i \leq n^\delta \varrho$ , we have

$$G_i d_i = f(\tilde{x}^i) - f(\hat{x}^i) \leq |\partial f|(\hat{x}^i) d_i + h \cdot d_i^{\alpha+1} + L(d_i - d(\hat{x}^i, \mathcal{D}_f))_+.$$

Hence,

$$\begin{aligned} (G_i - |\partial f|(\hat{x}^i)) \delta_i &= (G_i - |\partial f|(\hat{x}^i)) d_i \cdot \frac{\delta_i}{d_i} \\ &\leq h \cdot d_i^\alpha \delta_i + L(d_i - d(\hat{x}^i, \mathcal{D}_f))_+ \cdot \frac{\delta_i}{d_i} \\ &\leq h \cdot \delta_i^{\alpha+1} + L(\delta_i - d(\hat{x}^i, \mathcal{D}_f))_+. \end{aligned} \quad (9)$$

Therefore we have

$$\begin{aligned} & \frac{1}{n} \sum_{i=1}^n (f(x^i) - f(\hat{x}^i)) \\ & \geq \frac{1}{n} \left[ \sum_{i: d_i > n^\delta \varrho} \delta_i G_i + \sum_{i: d_i \leq n^\delta \varrho} G_i \delta_i - 2(h \cdot \delta_i^{\alpha+1} + L(\delta_i - d(\hat{x}^i, \mathcal{D}_f))_+) \right] + \frac{\epsilon}{n} \delta_{N+1} G_{N+1} \\ & \geq \frac{1}{n} \sum_{i=1}^N \delta_i G_i + \frac{\epsilon}{n} \delta_{N+1} G_{N+1} - \frac{2}{n} \sum_{i=1}^{N+1} (h \cdot (n^\delta \varrho)^{\alpha+1} + L((n^\delta \varrho) - d(\hat{x}^i, \mathcal{D}_f))_+) \\ & \geq \varrho(\|f\|_{\text{Lip}} - \Delta_n) - \frac{2h(N+1)}{n} (n^\delta \varrho)^{\alpha+1} - 2L\mathbb{E}_{\mathbb{P}_n} [(n^\delta \varrho - d(x, \mathcal{D}_f))_+] \\ & \geq \varrho(\|f\|_{\text{Lip}} - \Delta_n) - (4h\varrho^{\alpha+1})n^{\delta\alpha} - 2Le_n(n^\delta \varrho), \end{aligned}$$

Next we consider (RO). Fix  $N = \lfloor n^{1-\delta} \rfloor + 1$ , and we just perturb the first  $\lfloor n^{1-\delta} \rfloor$  points  $x^i$  with distance  $\delta_i = \|x^i - \hat{x}^i\| = \frac{n\varrho}{N} \leq n^\delta \varrho$  in the direction  $u^i$  so that

$$f(x^i) - f(\hat{x}^i) \geq |\partial f|(\hat{x}^i) \delta_i - (h \cdot \delta_i^{\alpha+1} + L(\delta_i - d(\hat{x}^i, \mathcal{D}_f)))_+,$$

and remain the rest points unchanged. Then,

$$\begin{aligned}
& \frac{1}{n} \sum_{i=1}^n (f(x^i) - f(\hat{x}^i)) \\
& \geq \frac{1}{n} \sum_{i=1}^n \left[ |\partial f|(\hat{x}^i) \delta_i - (h \cdot \delta_i^{\alpha+1} + L(\delta_i - d(\hat{x}^i, \mathcal{D}_f))_+) \right] \\
& \geq \frac{1}{n} \sum_{i=1}^N \delta_i |\partial f|(\hat{x}^i) - \frac{1}{n} \sum_{i=1}^N (h \cdot (n^\delta \varrho)^{\alpha+1} + L((n^\delta \varrho) - d(\hat{x}^i, \mathcal{D}_f))_+) \\
& \geq |\partial f|(\hat{x}^{N+1}) \varrho - \frac{hN}{n} (n^\delta \varrho)^{\alpha+1} - L \mathbb{E}_{\mathbb{P}_n} [(n^\delta \varrho - d(x, \mathcal{D}_f))_+] \\
& \geq |\partial f|(\hat{x}^{N+1}) \varrho - (2h \varrho^{\alpha+1}) n^{\delta \alpha} - L \mathbb{E}_{\mathbb{P}_n} [(n^\delta \varrho - d(x, \mathcal{D}_f))_+].
\end{aligned}$$

The rest follows a similar argument as for (WO).  $\square$

*Proof of Remark 2.* Here we bound  $\Delta_n$ . Observe that  $H_f(\Delta_n)$  is the  $(\lfloor n^{1-\delta} \rfloor + 1)$ -th order statistic of  $n$  i.i.d samplings from the unit uniform distribution, which follows Beta distribution  $B(\lfloor n^{1-\delta} \rfloor + 1, n - \lfloor n^{1-\delta} \rfloor)$ , which is sub-Gaussian with proxy variance  $\frac{1}{4(n+1)}$  [28]. Hence, for any  $t > 0$ , with probability at least  $1 - e^{-2nt^2}$ , we have

$$H(\Delta_n) - \frac{\lfloor n^{1-\delta} \rfloor + 1}{n+1} < t.$$

Replacing  $t$  with  $\frac{t}{\sqrt{n}}$ , we have with probability at least  $1 - e^{-2t}$ ,

$$\Delta_n \leq H^{-1}\left(\frac{t}{\sqrt{n}} + \frac{\lfloor n^{1-\delta} \rfloor + 1}{n+1}\right) \leq c^{-\beta} \left(\frac{t}{\sqrt{n}} + \frac{n^{1-\delta} + 1}{n+1}\right)^\beta,$$

whenever  $\frac{t}{\sqrt{n}} + \frac{\lfloor n^{1-\delta} \rfloor + 1}{n+1} \leq \bar{a}$ . When  $\varrho = \varrho_n = O(1/\sqrt{n})$ , by [18, Theorem 1] we have  $\varrho_n \Delta_n + 4hn^{\alpha\delta} \varrho^{\alpha+1} + 2Le_n(\varrho n^\delta) = O(n^{-\frac{\beta+1}{2}} + n^{-(\frac{1}{2}+\beta\delta)} + n^{-(1-2\delta)})$ .  $\square$

## C Proofs for Section 4

### C.1 Proofs of Propositions 4 and 5

In the sequel, we set  $\mathbf{x}^n := (x^1, \dots, x^n)$ , and define a metric  $\mathbf{d}$  on  $\mathcal{X}^n$  as  $\mathbf{d}(\tilde{\mathbf{x}}^n, \mathbf{x}^n) = (\sum_{i=1}^n \|\tilde{x}^i - x^i\|^p)^{1/p}$ . The following result follows from the proof of Lemma 5 in [17] by replacing  $\mathbb{E}_{\otimes}$  and  $\tau$  therein with  $\mathbb{E}_{S_n}$  and  $\tau_n n^{1-\frac{2}{p}}$ , respectively.

**Lemma 6.** *Let  $p \in [1, 2]$ . Assume Assumption 5 holds. Let  $F : \mathcal{X}^n \rightarrow \mathbb{R}$ . Assume  $\mathbb{E}_{S_n}[F] = 0$  and there exist  $M, L > 0$  and  $\mathbf{x}_0^n \in \mathcal{X}^n$  such that*

$$F(\mathbf{x}^n) \leq M + \frac{L}{n} \mathbf{d}(\mathbf{x}^n, \mathbf{x}_0^n)^p, \quad \forall \mathbf{x}^n \in \mathcal{X}^n.$$

Define  $\mathcal{R}(\cdot; F) : \mathbb{R}_+ \rightarrow \mathbb{R}_+$  as

$$\mathcal{R}_{S_n, p}(\varrho; F) = \min_{\lambda \geq 0} \left\{ \lambda \varrho^p + \mathbb{E}_{S_n} \left[ \sup_{\tilde{\mathbf{x}}^n \in \mathcal{X}^n} \left\{ F(\tilde{\mathbf{x}}^n) - F(\mathbf{x}^n) - \frac{\lambda}{n} \mathbf{d}(\tilde{\mathbf{x}}^n, \mathbf{x}^n)^p \right\} \right] \right\}.$$

Let  $t > 0$ . Then with probability at least  $1 - e^{-t}$ ,

$$F(\mathbf{x}^n) \leq \mathcal{R}_{S_n, p} \left( \sqrt{\frac{\tau_n t}{n^{\frac{2}{p}}}}; F \right).$$

*Proof of Propositions 4 and 5.* We first fix  $f \in \mathcal{F}$ . Set  $F(\mathbf{x}^n) = \mathbb{E}_{\mathbb{P}_{\text{true}}}[f] - \mathbb{E}_{\mathbb{P}_n}[f]$ . By definition  $\mathbb{E}_{S_n}[F(\mathbf{x}^n)] = 0$ . By Assumption 1 we have

$$\begin{aligned} F(\tilde{\mathbf{x}}^n) - F(\mathbf{x}^n) &\leq \sup_{f \in \mathcal{F}} \left\{ \frac{1}{n} \sum_{i=1}^n f(\tilde{x}^i) - f(x^i) \right\} \\ &\leq \frac{1}{n} \sum_{i=1}^n L \|\tilde{x}^i - x^i\| \\ &\leq \frac{1}{n} \sum_{i=1}^n L(1 + \|\tilde{x}^i - x^i\|^p) \\ &= L + L\mathbf{d}(\tilde{\mathbf{x}}^n, \mathbf{x}^n)^p. \end{aligned}$$

Hence, by Lemma 6, with probability at least  $1 - e^{-t}$ , we have

$$\begin{aligned} &\mathbb{E}_{\mathbb{P}_{\text{true}}}[f] - \mathbb{E}_{\mathbb{P}_n}[f] \\ &\leq F(\mathbf{x}^n) \\ &\leq \mathcal{R}_{S_n, p} \left( \sqrt{\frac{\tau_n t}{n^{\frac{2}{p}}}}; F \right) \\ &= \min_{\lambda \geq 0} \left\{ \lambda \left( \sqrt{\frac{\tau_n t}{n^{\frac{2}{p}}}} \right)^p + \mathbb{E}_{S_n} \left[ \sup_{\tilde{\mathbf{x}}^n \in \mathcal{X}^n} \left\{ F(\tilde{\mathbf{x}}^n) - F(\mathbf{x}^n) - \frac{\lambda}{n} \mathbf{d}(\tilde{\mathbf{x}}^n, \mathbf{x}^n)^p \right\} \right] \right\} \\ &\leq \min_{\lambda \geq 0} \left\{ \lambda \left( \sqrt{\frac{\tau_n t}{n^{\frac{2}{p}}}} \right)^p + \mathbb{E}_{S_n} \left[ \frac{1}{n} \sup_{\tilde{\mathbf{x}}^n \in \mathcal{X}^n} \sum_{i=1}^n (-f(\tilde{x}^i) + f(x^i) - \lambda \|\tilde{x}^i - x^i\|^p) \right] \right\} \\ &= \min_{\lambda \geq 0} \left\{ \lambda \left( \sqrt{\frac{\tau_n t}{n^{\frac{2}{p}}}} \right)^p + \mathbb{E}_{\mathbb{P}_{\text{true}}} \left[ \sup_{\tilde{x} \in \mathcal{X}} \left\{ -f(\tilde{x}) + f(x) - \lambda \|\tilde{x} - x\|^p \right\} \right] \right\}. \end{aligned}$$

We denote the last line as  $\mathcal{R}_p \left( \sqrt{\frac{\tau_n t}{n^{\frac{2}{p}}}}; -f \right)$ . Note that Assumption 1 implies that for any  $\lambda > \|f\|_{\text{Lip}}$ ,

$$\sup_{\tilde{x} \in \mathcal{X}} \left\{ -f(\tilde{x}) - f(x) - \lambda \|\tilde{x} - x\| \right\} = 0.$$

Consequently by definition  $\mathcal{R}_1(\varrho; -f) \leq \varrho \|f\|_{\text{Lip}}$  for all  $\varrho \geq 0$ . Moreover, for  $p \in (1, 2]$ , by Proposition 1 (in which  $\mathbb{P}_n$  is replaced with  $\mathbb{P}_{\text{true}}$ ), we have

$$\begin{aligned} \mathcal{R}_p(\varrho; -f) &\leq \varrho \|\partial(-f)\|_q + C_0 \varrho^{(\alpha+1) \wedge p} + 2Le((pL/\eta)^{\frac{1}{p-1}} \varrho) \\ &\leq \left( 1 - 2\mathfrak{R}_n(\mathcal{N}_q) - (L/\eta)^q \sqrt{\frac{t}{2n}} \right)^{-\frac{1}{q}} \varrho \|\partial(-f)\|_q + C_0 \varrho^{(\alpha+1) \wedge p} + 2Le((pL/\eta)^{\frac{1}{p-1}} \varrho), \end{aligned}$$

with probability at least  $1 - e^{-t}$ , following Lemma 5.

To obtain a uniform bound, by Assumption 6, for any distribution  $\mathbb{P}$  it holds that

$$\mathbb{E}_{\mathbb{P}}[f_{\theta'}] - \mathbb{E}_{\mathbb{P}}[f_{\theta}] \leq \kappa \|\theta' - \theta\|_{\Theta}.$$

Let  $\epsilon > 0$  and  $\Theta_{\epsilon}$  be an  $\epsilon$ -cover of  $\Theta$ .

When  $p = 1$ , we have that

$$\begin{aligned} &\mathbb{P}_{\mu_{S_n}} \left\{ \exists \theta \in \Theta, \text{ s.t. } \mathcal{L}^{\text{true}}(f_{\theta}) > \mathcal{L}_{n, \infty}^{\text{vr}}(f_{\theta}; \varrho) + 2\kappa\epsilon \right\} \\ &= \mathbb{P}_{\mu_{S_n}} \left\{ \exists \theta \in \Theta, \text{ s.t. } \mathbb{E}_{\mathbb{P}_{\text{true}}}[f_{\theta}] > \mathbb{E}_{\mathbb{P}_n}[f_{\theta}] + \varrho \|f_{\theta}\|_{\text{Lip}} + 2\kappa\epsilon \right\} \\ &\leq \mathbb{P}_{\mu_{S_n}} \left\{ \exists \theta' \in \Theta_{\epsilon}, \text{ s.t. } \mathbb{E}_{\mathbb{P}_{\text{true}}}[f_{\theta'}] > \mathbb{E}_{\mathbb{P}_n}[f_{\theta'}] + \varrho \|f_{\theta'}\|_{\text{Lip}} \right\} \\ &\leq \sum_{\theta' \in \Theta_{\epsilon}} \mathbb{P}_{\mu_{S_n}} \left\{ \mathbb{E}_{\mathbb{P}_{\text{true}}}[f_{\theta'}] > \mathbb{E}_{\mathbb{P}_n}[f_{\theta'}] + \varrho \|f_{\theta'}\|_{\text{Lip}} \right\}. \end{aligned}$$

Letting  $\epsilon = 1/n$  yields that with probability at least  $1 - \mathcal{N}(\epsilon; \Theta, \|\cdot\|_\Theta)e^{-t}$ , for every  $\theta \in \Theta$ ,

$$\mathbb{E}_{\mathbb{P}_{\text{true}}}[f_\theta] - \mathbb{E}_{\mathbb{P}_n}[f_\theta] \leq \mathcal{R}_1\left(\sqrt{\frac{\tau_n t}{n^2}}; -f_\theta\right) + \frac{2\kappa}{n}.$$

Replacing  $t$  with  $t + \log \mathcal{N}(\epsilon; \Theta, \|\cdot\|_\Theta)$  yields Proposition 4.

When  $p \in (1, 2]$ , let

$$\tilde{\epsilon} = C_0 \varrho^{(\alpha+1) \wedge p} + 2Le((pL/\eta)^{\frac{1}{p-1}} \varrho).$$

We have that

$$\begin{aligned} & \mathbb{P}_{\mu_{S_n}} \left\{ \exists \theta \in \Theta, \text{ s.t. } \mathcal{L}^{\text{true}}(f_\theta) > \mathcal{L}_{n,q}^{\text{vr}}(f_\theta; \varrho) + 2\kappa\epsilon + \tilde{\epsilon} \right\} \\ &= \mathbb{P}_{\mu_{S_n}} \left\{ \exists \theta \in \Theta, \text{ s.t. } \mathbb{E}_{\mathbb{P}_{\text{true}}}[f_\theta] > \mathbb{E}_{\mathbb{P}_n}[f_\theta] + \varrho \|\partial f_\theta\|_q + 2\kappa\epsilon + \tilde{\epsilon} \right\} \\ &= \mathbb{P}_{\mu_{S_n}} \left\{ \exists \theta \in \Theta, \text{ s.t. } \mathbb{E}_{\mathbb{P}_{\text{true}}}[f_\theta] > \mathbb{E}_{\mathbb{P}_n}[f_\theta] + \varrho \|\partial(-f_\theta)\|_q + 2\kappa\epsilon + \tilde{\epsilon} \right\} \\ &\leq e^{-t} + \mathbb{P}_{\mu_{S_n}} \left\{ \exists \theta' \in \Theta_\epsilon, \text{ s.t. } \mathbb{E}_{\mathbb{P}_{\text{true}}}[f_{\theta'}] > \mathbb{E}_{\mathbb{P}_n}[f_{\theta'}] + (1 - 2\mathfrak{R}_n(\mathcal{N}_q) - (L/\eta)^q \sqrt{\frac{t}{2n}})^{-\frac{1}{q}} \varrho \|\partial(-f_{\theta'})\|_{q, \mathbb{P}_n} + \tilde{\epsilon} \right\} \\ &\leq e^{-t} + \sum_{\theta' \in \Theta_\epsilon} \mathbb{P}_{\mu_{S_n}} \left\{ \mathbb{E}_{\mathbb{P}_{\text{true}}}[f_{\theta'}] > \mathbb{E}_{\mathbb{P}_n}[f_{\theta'}] + (1 - 2\mathfrak{R}_n(\mathcal{N}_q) - (L/\eta)^q \sqrt{\frac{t}{2n}})^{-\frac{1}{q}} \varrho \|\partial(-f_{\theta'})\|_{q, \mathbb{P}_n} + \tilde{\epsilon} \right\}. \end{aligned}$$

Letting  $\epsilon = 1/n$  yields that with probability at least  $1 - (1 + \mathcal{N}(\frac{1}{n}; \Theta, \|\cdot\|_\Theta))e^{-t}$ , for every  $\theta \in \Theta$ ,

$$\mathbb{E}_{\mathbb{P}_{\text{true}}}[f_\theta] - \mathbb{E}_{\mathbb{P}_n}[f_\theta] \leq \mathcal{L}_{n,q}^{\text{vr}}(f_\theta; \varrho_n) + \frac{2\kappa}{n} + \tilde{\epsilon}_n.$$

Finally, replacing  $t$  with  $t + \log(1 + \mathcal{N}(\frac{1}{n}; \Theta, \|\cdot\|_\Theta))$  yields Proposition 5.  $\square$

## C.2 Proof for Example 1

**Lemma 7.** *We gather a few simple facts about Assumption 6:*

- (i) *If  $\{f_\theta : \theta \in \Theta\}$  satisfies Assumption 6 with parameter  $\kappa$ , and  $\phi$  is a  $L$ -Lipschitz over the range of all functions in  $\{f_\theta : \theta \in \Theta\}$ , then  $\{\phi \circ f_\theta : \theta \in \Theta\}$  satisfies Assumption 6 with parameter  $L\kappa$ .*
- (ii) *If both  $\{f_\theta : \theta \in \Theta\}$  and  $\{g_\theta : \theta \in \Theta\}$  satisfy Assumption 6 with parameters  $\kappa_1$  and  $\kappa_2$ , then  $\{af_\theta + bg_\theta : \theta \in \Theta\}$  satisfies Assumption 6 with parameters  $a\kappa_1 + b\kappa_2$  for any constants  $a, b \geq 0$ .*
- (iii)  *$\{x \mapsto \theta^\top x : \theta \in \Theta, \|x\|_2 \leq B\}$  satisfies Assumption 6 with parameter  $B$  when  $\|\theta\| = \|\cdot\|_2$ .*
- (iv)  *$\{x \mapsto \|W^\top x\|_2 : W \in \mathcal{W} \subset \mathbb{R}^{d \times k}, \|x\|_2 \leq B\}$  satisfies Assumption 6 with parameter  $B$  when  $\|W\|_{\mathcal{W}} = \|W\|_F$ .*

*Proof.* (i)  $|\phi \circ f_{\theta_1} - \phi \circ f_{\theta_2}| \leq L|f_{\theta_1} - f_{\theta_2}| \leq L\kappa\|\theta_1 - \theta_2\|$ .

(ii)  $|af_{\theta_1} + bg_{\theta_1} - af_{\theta_2} - bg_{\theta_2}| \leq a|f_{\theta_1} - f_{\theta_2}| + b|g_{\theta_1} - g_{\theta_2}| \leq (a\kappa_1 + b\kappa_2)\|\theta_1 - \theta_2\|_2$ .

(iii)  $|\theta_1^\top x - \theta_2^\top x| \leq \|\theta_1 - \theta_2\|_2 \|x\|_2 \leq B\|\theta_1 - \theta_2\|_2$ .

(iv)  $\| \|W_1^\top x\|_2 - \|W_2^\top x\|_2 \| \leq \| (W_1 - W_2)^\top x \|_2 \leq \|W_1 - W_2\|_2 \|x\|_2 \leq B\|W_1 - W_2\|_2$ .  $\square$

Set  $\tilde{\theta} = [\theta, -1]$ , then  $f_{\tilde{\theta}}(x, y) = |\tilde{\theta}^\top(x, y)|^p \in \mathcal{F}$ . It is clear from the definition that every  $f \in \mathcal{F}$  is piece-wise differentiable. We assumed both feature space  $\mathcal{X}$  and the weight space  $\Theta$  are bounded:  $\|x\|_2 \leq B_1$  for all  $x \in \mathcal{X}$ ,  $|y| \leq B_2$  for all  $y \in \mathcal{Y}$ , and  $\|\theta\|_2 \leq B_3 - 1$  for all  $\theta \in \Theta$ . Note that  $|\cdot|^p$  is Lipschitz, with constant bounded by the upper bound of the gradient norm:

$$p|\tilde{\theta}^\top(x, y)|^{p-1} \leq p\|\tilde{\theta}\|_2^{p-1} \|(x, y)\|_2^{p-1} \leq pB_3^{p-1}(B_1 + B_2)^{p-1}, \quad (10)$$

hence Assumption 1 is verified.

To verify Assumption 6, observe that by (10),  $|\cdot|^p$  is Lipschitz over the range of  $\tilde{\theta}^\top(x, y)$ , for all  $\theta \in \Theta$ . The verification follows from Lemma 7 (i) and (iii).



## D Proofs for Section 5

### D.1 Proofs for Example 3

Let us verify  $\mathcal{F}$  is a family of Lipschitz functions, hence Assumption 1.

$$\begin{aligned} |f_W(x) - f_W(\tilde{x})| &\leq \|W^\top(x - \tilde{x})\|_2(\|W^\top \tilde{x}\|_2 + \|W^\top x\|_2) \\ &\leq 2B\|W\|_F^2\|x - \tilde{x}\|_2, \end{aligned}$$

hence we get that  $f_W$  is  $2Bk$ -Lipschitz.

Moreover, we have that

$$\begin{aligned} \mathbb{E}_{\mathbb{P}_{\text{true}}}[\|\nabla f_W\|_2^2] &= \mathbb{E}_{\mathbb{P}_{\text{true}}}[\|2WW^\top x\|_2^2] \\ &= 4\mathbb{E}_{\mathbb{P}_{\text{true}}}[x^\top WW^\top x] \\ &= 4\text{Tr}(W^\top \mathbb{E}_{\mathbb{P}_{\text{true}}}[xx^\top]W) \\ &= \sum_{j=1}^k w_j^\top \mathbb{E}_{\mathbb{P}_{\text{true}}}[xx^\top]w_j \\ &\geq 4k\lambda_{\min} \mathbb{E}_{\mathbb{P}_{\text{true}}}[xx^\top], \end{aligned}$$

hence Assumption 3 is verified with  $\eta = 2\sqrt{k\lambda_{\min} \mathbb{E}_{\mathbb{P}_{\text{true}}}[xx^\top]}$ .

To verify Assumption 6, observe that  $\|W^\top x\|_2 \leq \|W\|_F\|x\|_2 \leq \sqrt{k}B$ , hence  $(\cdot)^2$  is Lipschitz over the range of  $\|W^\top x\|_2$ , where  $W^\top W = I_k$ . Hence, using Lemma 7(i)(iv) we have  $\kappa = 2\sqrt{k}B^2$ .

### D.2 Proofs for Section 5.2

**Lemma 8.** *Assume Assumptions 1, 2 and 4 hold, and  $\mathbb{P}_{\text{true}}$  is continuous, and  $\varrho \leq c^{\frac{1}{\beta}}(\frac{\bar{a}}{2})^{\frac{1}{\beta\delta}}$ , where the constants are from Assumption 4. Then*

$$|\mathcal{L}_1^{\text{adv}}(\varrho; f) - \mathcal{L}_\infty^{\text{vr}}(\varrho; f)| \leq C\varrho^{(1+\frac{\alpha\beta}{\alpha+\beta})}, \quad \forall f \in \mathcal{F}.$$

*Proof.* For every  $x \in \mathcal{X}$ , let  $S(x)$  be such that

$$f(S(x)) - f(x) = d(x, S(x))G(f)(x),$$

where we have assumed the existence of the maximizer defining  $G(f)(x)$ , otherwise we can argue by approximation. Let  $\epsilon, \delta > 0$ . Set  $\mathcal{X}_\epsilon = \{x \in \mathcal{X} : G(f)(x) > \|G(f)\|_{\infty, \mathbb{P}_{\text{true}}} - \epsilon\}$ .

Define a mapping  $T_\epsilon : \mathcal{X} \rightarrow \mathcal{X}$  as

$$T_\epsilon(x) = \begin{cases} S(x), & \text{if } x \in \mathcal{X}_\epsilon, d(x, S(x)) \geq \varrho^{1-\delta}, \\ x + \varrho^{1-\delta}u, & \text{if } x \in \mathcal{X}_\epsilon, d(x, S(x)) < \varrho^{1-\delta}, \\ x, & \text{if } x \in (\mathcal{X} \setminus \mathcal{X}_\epsilon) \cup \mathcal{D}_f, \end{cases}$$

where  $u$  is the direction such that

$$f(T_\epsilon(x)) - f(x) \geq |\partial f|(x) \cdot d(x, T_\epsilon(x)) - h \cdot d(x, T_\epsilon(x))^{\alpha+1},$$

which holds due to (4).

Define the monotonically increasing function

$$M(\epsilon) = \mathbb{E}_{\mathbb{P}_{\text{true}}}[d(x, T_\epsilon(x))\mathbf{1}\{x \in \mathcal{X}_\epsilon, d(x, S(x)) \geq \varrho^{1-\delta}\}] + \varrho^{1-\delta}\mathbb{E}_{\mathbb{P}_{\text{true}}}[\mathbf{1}\{x \in \mathcal{X}_\epsilon, d(x, S(x)) < \varrho^{1-\delta}\}],$$

and define

$$\epsilon = \inf_{\epsilon \geq 0} \{M(\epsilon) \geq \varrho\}.$$

By Assumption 4, we have

$$M\left(\frac{\bar{a}}{2}\right) \geq \varrho^{1-\delta}\mathbb{E}_{\mathbb{P}_{\text{true}}}[\mathbf{1}\{x \in \mathcal{X}_{\frac{\bar{a}}{2}}\}] \geq \varrho^{1-\delta}c\left(\frac{\bar{a}}{2}\right)^{\frac{1}{\beta}} \geq \varrho.$$

It follows that  $\epsilon \leq \frac{\bar{a}}{2} < \bar{a}$ . For any  $\epsilon_0 < \epsilon$ , we similarly have

$$\varrho > M(\epsilon_0) \geq \varrho^{1-\delta} \mathbb{E}_{\mathbb{P}_{\text{true}}}[\mathbf{1}\{x \in \mathcal{X}_{\epsilon_0}\}] \geq \varrho^{1-\delta} c(\epsilon_0)^{\frac{1}{\beta}}.$$

Taking the limit  $\epsilon_0 \rightarrow \epsilon$ , we get that  $\varrho^{1-\delta} c \epsilon^{\frac{1}{\beta}} \leq \varrho$ , which implies  $\epsilon \leq (\frac{\varrho^\delta}{c})^\beta$ . Define  $\epsilon_1 = \epsilon + (\frac{\varrho^\delta}{c})^\beta$ . Since  $M(\epsilon_1) \geq \varrho$ , we choose  $r \leq 1$  such that  $rM(\epsilon_1) = \varrho$ . Now we define a distribution  $\mathbb{P} = (1-r)\mathbb{P}_{\text{true}} + rT_{\epsilon_1 \#} \mathbb{P}_{\text{true}}$ . Then

$$\mathbb{E}_{\mathbb{P}}[f(x)] - \mathbb{E}_{\mathbb{P}_{\text{true}}}[f(x)] = r(\mathbb{E}_{\mathbb{P}_{\text{true}}}[f(T_{\epsilon_1}(x))] - \mathbb{E}_{\mathbb{P}_{\text{true}}}[f(x)]).$$

For  $x \in \mathcal{X}_{\epsilon_1}$ , if  $d(x, S(x)) \geq \varrho^{1-\delta}$ , we have  $f(T_{\epsilon_1}(x)) - f(x) = G(f)(x) \cdot d(x, T_{\epsilon_1}(x))$ , and if  $d(x, S(x)) < \varrho^{1-\delta}$ , similar to (8) (9) in proof of Proposition 3, it holds that

$$f(T_{\epsilon_1}(x)) - f(x) \geq G(f)(x)d(T_{\epsilon_1}(x), x) - 2h \cdot d(T_{\epsilon_1}(x), x)^{\alpha+1}.$$

It follows that

$$\begin{aligned} \mathbb{E}_{\mathbb{P}}[f(x)] - \mathbb{E}_{\mathbb{P}_{\text{true}}}[f(x)] &= r(\mathbb{E}_{\mathbb{P}_{\text{true}}}[f(T_{\epsilon_1}(x))] - \mathbb{E}_{\mathbb{P}_{\text{true}}}[f(x)]) \\ &\geq rM(\epsilon_1)(\|G(f)\|_{\infty, \mathbb{P}_{\text{true}}} - \epsilon_1) - 2rh\varrho^{(1-\delta)(\alpha+1)} \mathbb{E}_{\mathbb{P}_{\text{true}}}[\mathbf{1}\{x \in \mathcal{X}_{\epsilon_1}\}] \\ &\geq \varrho \|G(f)\|_{\infty, \mathbb{P}_{\text{true}}} - 2c^{-\beta} \varrho^{1+\delta\beta} - 2h\varrho^{(1-\delta)(\alpha+1)+\delta}, \end{aligned}$$

where the last row is due to  $r\mathbb{E}_{\mathbb{P}_{\text{true}}}[\mathbf{1}\{x \in \mathcal{X}_{\epsilon_1}\}] \varrho^{1-\delta} \leq rM(\epsilon_1) = \varrho$ .

Setting  $\delta = \frac{\alpha}{\alpha+\beta}$  yields that

$$\mathbb{E}_{\mathbb{P}_{\text{true}}}[f(T_{\epsilon_1}(x))] - \mathbb{E}_{\mathbb{P}_{\text{true}}}[f(x)] \geq \varrho \|G(f)\|_{\infty, \mathbb{P}_{\text{true}}} - C\varrho^{(1+\frac{\alpha\beta}{\alpha+\beta})}.$$

□

*Proof of Theorems 3 and 4.* Set  $\mathcal{L}_q^{\text{vr}}(\varrho; f) := \mathbb{E}_{\mathbb{P}_{\text{true}}}[f] + \varrho \|\partial f\|_q$ . Observe the following decomposition

$$\begin{aligned} &|\mathcal{L}_{n,p}^{\text{wo}}(\varrho; f) - \mathcal{L}_p^{\text{adv}}(\varrho; f)| \\ &\leq |\mathcal{L}_{n,p}^{\text{wo}}(\varrho; f) - \mathcal{L}_{n,q}^{\text{vr}}(\varrho; f)| + |\mathcal{L}_{n,q}^{\text{vr}}(\varrho; f) - \mathcal{L}_q^{\text{vr}}(\varrho; f)| + |\mathcal{L}_q^{\text{vr}}(\varrho; f) - \mathcal{L}_p^{\text{adv}}(\varrho; f)|. \end{aligned} \quad (11)$$

Below we bound the three terms on the right-hand side separately. For the last term, by [2, Remark 9], we have  $|\mathcal{L}_p^{\text{wo}}(\varrho; f) - \mathcal{L}_q^{\text{vr}}(\varrho; f)| \leq C\varrho^2$  for some  $C \geq 0$ .

We consider  $p > 1$  first. For the first term, by Proposition 1, we have

$$|\mathcal{L}_{n,p}^{\text{wo}}(\varrho; f) - \mathcal{L}_{n,q}^{\text{vr}}(\varrho; f)| \leq C_0\varrho^{(\alpha+1)\wedge p} + 2Le_n((pL/\tilde{\eta})^{q-1}\varrho).$$

For the second term, it follows from Lemma 3 and Lemma 5 that with probability at least  $1 - 2e^{-t}$ ,

$$\begin{aligned} |\mathcal{L}_{n,q}^{\text{vr}}(\varrho; f) - \mathcal{L}_q^{\text{vr}}(\varrho; f)| &\leq |\mathbb{E}_{\mathbb{P}_{\text{true}}}[f] - \mathbb{E}_{\mathbb{P}_n}[f]| + \varrho \left| \|\partial f\|_{q, \mathbb{P}_n} - \|\partial f\|_{q, \mathbb{P}_{\text{true}}} \right| \\ &\leq 2\mathfrak{R}_n(\mathcal{F}) + M\sqrt{\frac{t}{2n}} + \frac{\varrho}{q}(\eta \wedge \tilde{\eta})^{-\frac{q}{p}} \left( 2\mathfrak{R}_n(\partial\mathcal{F}_q) + L^q\sqrt{\frac{t}{2n}} \right). \end{aligned}$$

Therefore, we obtain the result.

Next, we consider  $p = 1$ . By Proposition 3,

$$|\mathcal{L}_{n,1}^{\text{wo}}(\varrho; f) - \mathcal{L}_{n,\infty}^{\text{vr}}(\varrho; f)| \leq \epsilon_n.$$

Moreover, with probability at least  $1 - e^{-t}$ ,

$$\begin{aligned} |\mathcal{L}_{n,\infty}^{\text{vr}}(\varrho; f) - \mathcal{L}_{\infty}^{\text{vr}}(\varrho; f)| &\leq \sup_{f \in \mathcal{F}} \{ |\mathbb{E}_{\mathbb{P}_{\text{true}}}[f] - \mathbb{E}_{\mathbb{P}_n}[f]| + \varrho \left| \|G(f)\|_{\infty, \mathbb{P}_{\text{true}}} - \|G(f)\|_{\infty, \mathbb{P}_n} \right| \} \\ &\leq 2\mathfrak{R}_n(\mathcal{F}) + M\sqrt{\frac{t}{2n}} + \Delta_n\varrho \\ &\leq 2\mathfrak{R}_n(\mathcal{F}) + M\sqrt{\frac{t}{2n}} + \epsilon_n. \end{aligned}$$

Finally, the third term is computed in Lemma 8. Thereby we complete the proof. □
